# Supplementary material
Source: PubMed Central journal article supplement (PMC11030553)
Supplement: 262_2010_856_MOESM1_ESM.pdf [file 262_2010_856_MOESM1_ESM.pdf]

**Supplementary Table 1** Primers used for transcriptomic profilings, ERAP1 promotor cloning, ERAP1 promotor sequencing, ERAP1 mutagenesis and ERAP1 genomic sequencing

| primer name             | sequence 5' to 3'                               | application               | conditions                                                                             |
|-------------------------|-------------------------------------------------|---------------------------|----------------------------------------------------------------------------------------|
| β-actin for             | TCCTGTGGCATCCACGAAACT                           | real time PCR             | 60°C, 30 sec,<br>72°C, 30 sec,<br>x 40                                                 |
| β-actin rev             | GAAGCATTGCGGTGGACGAT                            |                           |                                                                                        |
| ERAP1 for               | TCATCCTCCCAGAAGAGGTG                            |                           |                                                                                        |
| ERAP1 rev               | AACCTTGAAACACGGGCATA                            |                           |                                                                                        |
| ERAP2 for               | CCAAGCCAAGTTAGGTGATG                            |                           |                                                                                        |
| ERAP2 rev               | AGTGCAATATGCCTGCTCTC                            |                           |                                                                                        |
| GAPDH for               | CCTGCACCACCAACTGCTTA                            |                           |                                                                                        |
| GAPDH rev               | CTGAAGGCCATGCAAGTGAG                            |                           |                                                                                        |
| IRF1 for                | CTCCAGCACTGTCGCCATGT                            |                           |                                                                                        |
| IRF1 rev                | CCACTCCGACTGCTCCAAGA                            |                           |                                                                                        |
| ERAP1_pro_for           | CCCAAGCTTGAGATAGAAGGTAGGCAC<br>AAGACAC          | ERAP1 promoter cloning    | 95°C, 10 sec,<br>60°C, 55 sec,<br>72°C, 60sec,<br>x 34                                 |
| ERAP1_pro_rev           | CCCAAGCTTAAAGTGAAAGTGGAGCCC<br>G                |                           |                                                                                        |
| E1Promotor2 for         | GGG GAG TGA AGA AAT GGT CA                      | ERAP1 promoter sequencing |                                                                                        |
| E1Promotor2 rev         | GCG CAA GAA AGA ATT TGA GG                      |                           |                                                                                        |
| ERAP1Seq1for            | TGGGCTGACTGGCTGTGA                              | ERAP1 mRNA sequencing     |                                                                                        |
| ERAP1Seq2for            | TCACAGCCAGTCAGCCCA                              |                           |                                                                                        |
| ERAP1Seq3for            | CAGAACCAAGGAAGGGGAA                             |                           |                                                                                        |
| ERAP1Seq4for            | ATTTGAGATTTTGTGCTGTCAGC                         |                           |                                                                                        |
| ERAP1Seq5for            | TTGATGCACAAAAGTCTTCTGC                          |                           |                                                                                        |
| ERAP1Seq6for            | CCCTGTGTCTACACCTGTGG                            |                           |                                                                                        |
| ERAP1Seq7for            | AGTCAACATTCATCTTCATCCTCA                        |                           |                                                                                        |
| ERAP1Seq8for            | CAAAAACAGATGTGCTCATCCT                          |                           |                                                                                        |
| ERAP1Seq9for            | AACTGAAATTATGCCCGTGTTC                          |                           |                                                                                        |
| ERAP1Seq10for           | TTCAGAAAGTGGGAAGGAATCCA                         |                           |                                                                                        |
| ERAP1Seq11for           | AAATTCTTACACTCATTGGCAGG                         |                           |                                                                                        |
| ERAP1Seq12for           | AAACATCGGTTGGATGGATAAG                          |                           |                                                                                        |
| ERAP1Seq1rev            | CTCTCTCCAGCTCCCTTCT                             |                           |                                                                                        |
| cloning ERAP1 F         | AAAGGATCCAAGAAGATGGTGTTCCTG                     | ERAP1 cloning             | 95°C, 5 min,<br>95°C, 30 sec,<br>60°C, 3 min,<br>x 40                                  |
| cloning ERAP1 R         | TTTCTCGAGGAATTTTACATACGTTT                      |                           |                                                                                        |
| mutageneseERAP1_akt for | CATCACAATGACTGTGGCCCATGCACT<br>GGCTC            | mutagenesis               | 95°C, 1 min,<br>50°C, 50 sec,<br>60°C, 50 sec,<br>68°C, 7 min,<br>x 18<br>4°C for ever |
| mutageneseERAP1_akt rev | CCAAACCACTGGTGAGCCAGTGCATG<br>GGCC              |                           |                                                                                        |
| mutageneseERAP1_349 for | CAAGTAAGCTTGGCATCACAGTGAAGT<br>TGGCCCATGAACTGGC |                           |                                                                                        |
| mutageneseERAP1_349 rev | GCCAGTTCATGGGCCACAGTCACTGTG<br>ATGCCAAGCTTACTTG |                           |                                                                                        |
| Colo857Prom_Mut for     | CTTCCTACGCCTGATCCCCACATCGC<br>AACCTCGCAGCTTCC   |                           |                                                                                        |
| Colo857Prom_Mut rev     | GGAAGCTGCGAGGTTGCGATGTGGGG<br>GATCAGGCGTAGGAAG  |                           |                                                                                        |

| primer name   | sequence 5' to 3'           | application                                                   | conditions                                                     |
|---------------|-----------------------------|---------------------------------------------------------------|----------------------------------------------------------------|
| E1Exon 1 for  | TGTGAATGCTGGGTGGATAC        | ERAP1<br>genomic<br>sequencing<br>(amplification<br>of exons) | DNA<br>98°C, 10 sec,<br>60°C, 55 sec,<br>72°C, 60 sec,<br>x 40 |
| E1Exon 1 rev  | AAGCAAGGGAAAAAGCCATT        |                                                               |                                                                |
| E1Exon 2 for  | CCTGTTTTAGAGTTCCTGGTGC      |                                                               |                                                                |
| E1Exon 2 rev  | CTGGGCTAGTGCAAGTCACA        |                                                               |                                                                |
| E1Exon 3 for  | GGAGTGCAGTGGCTCAATCT        |                                                               |                                                                |
| E1Exon 3 rev  | GGCTGGAGTGCACAATCA          |                                                               |                                                                |
| E1Exon 4 for  | ATGTGGGGAGAGAAGCCAG         |                                                               |                                                                |
| E1Exon 4 rev  | AGGGTGAGGAGATGCTCAGA        |                                                               |                                                                |
| E1Exon 5 for  | TTAGTGTTTGGGAGAATGTATAGCTT  |                                                               |                                                                |
| E1Exon 5 rev  | TCAGTTCAGGATGGGTCACA        |                                                               |                                                                |
| E1Exon 6 for  | TGAGTGTCTTTGTTTATGGCTTATG   |                                                               |                                                                |
| E1Exon 6 rev  | CTGCAATGAGCAACCTGAAG        |                                                               |                                                                |
| E1Exon 7 for  | TAACTAAAATCATTGTTTCTTGGGTAG |                                                               |                                                                |
| E1Exon 7 rev  | CCAGCACGTGTCAAGAGAGA        |                                                               |                                                                |
| E1Exon 8 for  | GTTTAACTGCTTACTCTGTTTCACA   |                                                               |                                                                |
| E1Exon 8 rev  | AGCTCTGCAACCCTCCAGTA        |                                                               |                                                                |
| E1Exon 9 for  | ATGGCAAGTGTGAGTATGTTTTTG    |                                                               |                                                                |
| E1Exon 9 rev  | AGCTCTGCAACCCTCCAGTA        |                                                               |                                                                |
| E1Exon 10 for | TTTCTTAGAGTTGGGTAAATGGG     |                                                               |                                                                |
| E1Exon 10 rev | ATGGGGGCAGGGAGTATAAG        |                                                               |                                                                |
| E1Exon 11 for | ACAGACTGGGGATGTTTTGAG       |                                                               |                                                                |
| E1Exon 11 rev | AATAAACCGCGACTTTGTGC        |                                                               |                                                                |
| E1Exon 12 for | TCACAAAATTGATGTCTAAAGCTAG   |                                                               |                                                                |
| E1Exon 12 rev | AATAAACCGCGACTTTGTGC        |                                                               |                                                                |
| E1Exon 13 for | CAGCCTCCACATACCAAGTA        |                                                               |                                                                |
| E1Exon 13 rev | TCAGGATGAATTGCGACTTTT       |                                                               |                                                                |
| E1Exon 14 for | TCCAGCATTTGTTGTTGTTTTC      |                                                               |                                                                |
| E1Exon 14 rev | CCTCTTCCCTCTGCTGTCTG        |                                                               |                                                                |
| E1Exon 15 for | TTTATATTTCCAGGCATGCTTCTC    |                                                               |                                                                |
| E1Exon 15 rev | GGGAACCATGAACTTGGATG        |                                                               |                                                                |
| E1Exon 16 for | GGGAGAACCAGGTGTTAGGA        |                                                               |                                                                |
| E1Exon 16 rev | TGACAGAAGCAGGAAATGCT        |                                                               |                                                                |
| E1Exon 17 for | TCTTTTGAGCAAATGAGAGGGT      |                                                               |                                                                |
| E1Exon 17 rev | GGGAACCATGAACTTGGATG        |                                                               |                                                                |
| E1Exon 18 for | AATCCTATTCAGACAGCTGGGA      |                                                               |                                                                |
| E1Exon 18 rev | CATGGTAGCGATAGCCATT         |                                                               |                                                                |
| E1Exon 19 for | CATGGGGACTTTCTTCATTGT       |                                                               |                                                                |
| E1Exon 19 rev | TTACATGCTGTGAGGCAAGG        |                                                               |                                                                |
